# Supplementary material
Source: bioRxiv or medRxiv preprint supplement (https://www.biorxiv.org/highwire/filestream/31159/field_highwire_adjunct_files/0/108290-1.pdf)
Supplement: Supplementary file [file 108290-1.pdf]

## 1 **Supplementary Material**

2 Jedidiah Carlson<sup>1</sup>, Laura J Scott<sup>2</sup>, Adam E Locke<sup>3</sup>, Matthew Flickinger<sup>2</sup>, Shawn Levy<sup>4</sup>, Richard M  
3 Myers<sup>4</sup>, Michael Boehnke<sup>2</sup>, Hyun Min Kang<sup>2</sup>, Jun Z Li<sup>1,5\*</sup>, Sebastian Zöllner<sup>2,6\*</sup>, Devin Absher<sup>4</sup>, Huda  
4 Akil<sup>7</sup>, Gerome Breen<sup>8</sup>, Margit Burmeister<sup>1,5,6,7</sup>, Sarah Cohen-Woods<sup>9</sup>, William G Iacono<sup>10</sup>, James A  
5 Knowles<sup>11</sup>, Lisa Legrand<sup>10</sup>, Qing Lu<sup>12</sup>, Matthew McGue<sup>10</sup>, Melvin G McInnis<sup>6</sup>, Carlos N Pato<sup>13</sup>, Michele T  
6 Pato<sup>14</sup>, Margarita Rivera<sup>8</sup>, Janel L Sobell<sup>11</sup>, John B Vincent<sup>15</sup>, Stanley J Watson<sup>7</sup>

7

8 <sup>1</sup>Department of Computational Medicine & Bioinformatics, University of Michigan, Ann Arbor, MI, USA

9 <sup>2</sup>Department of Biostatistics, University of Michigan, Ann Arbor, MI, USA

10 <sup>3</sup> McDonnell Genome Institute & Department of Medicine, Washington University, St. Louis, MO, USA

11 <sup>4</sup>HudsonAlpha Institute for Biotechnology, Huntsville, AL, USA

12 <sup>5</sup>Department of Human Genetics, University of Michigan, Ann Arbor, MI, USA

13 <sup>6</sup>Department of Psychiatry, University of Michigan, Ann Arbor, MI, USA

14 <sup>7</sup>Molecular & Behavioral Neuroscience Institute, University of Michigan, Ann Arbor, MI, USA

15 <sup>8</sup>MRC Social Genetic and Developmental Psychiatry Centre, Institute of Psychiatry Psychology and  
16 Neuroscience, King's College London, London, UK

17 <sup>9</sup>School of Psychology, Flinders University, Adelaide, South Australia, AU

18 <sup>10</sup>Department of Psychology, University of Minnesota, Minneapolis, MN, USA

19 <sup>11</sup>Department of Psychiatry and the Behavioral Sciences, University of Southern California, Los  
20 Angeles, CA, USA

21 <sup>12</sup>Department of Epidemiology and Biostatistics, Michigan State University, East Lansing, MI, USA

22 <sup>13</sup>Dean of The College of Medicine, Senior Vice President for Research, SUNY Downstate Medical  
23 Center, Brooklyn, NY, USA

24 <sup>14</sup>Department of Psychiatry, SUNY Downstate Medical Center, Brooklyn, NY, USA

25 <sup>15</sup>Molecular Neuropsychiatry and Development Laboratory; Campbell Family Mental Health Research  
26 Institute, Toronto, ON, CA

27 *\*both authors contributed equally*

28 [Table of Contents](#)

29 Supplementary Note ..... 3

30     Supplementary Note 1. Potential Sources of bias..... 3

31     Supplementary Note 2. Comparison of 7-mer relative mutation rates with independent estimates ..... 4

32     Supplementary Note 3. Tests for enrichment/depletion of de novo mutations in feature-associated

33     subtypes..... 5

34     Supplementary Note 4. Potential mechanisms for TTAAAA hypermutability..... 6

35     Supplementary Note 5. Derivation of false discovery rate by Ts/Tv statistics ..... 8

36     Acknowledgements ..... 9

37     References..... 10

38 Supplementary Figures..... 11

39     Supplementary Figure 1 ..... 11

40     Supplementary Figure 2 ..... 12

41     Supplementary Figure 3 ..... 13

42     Supplementary Figure 4 ..... 14

43     Supplementary Figure 5 ..... 15

44     Supplementary Figure 6 ..... 16

45 Supplementary Tables ..... 17

46     Supplementary Table 1 ..... 17

47     Supplementary Tables 2a-2d ..... 17

48     Supplementary Table 3a ..... 18

49     Supplementary Table 3b ..... 19

50     Supplementary Table 4 ..... 22

51     Supplementary Table 5 ..... 23

52     Supplementary Table 6a ..... 24

53     Supplementary Table 6b ..... 25

54     Supplementary Table 7 ..... 26

55

56

## 57 Supplementary Note

### 58 **Supplementary Note 1. Potential Sources of bias**

#### 59 **1). Motif-specific error rates**

60 It has been shown that certain sequence motifs may be more susceptible to sequencing error, which  
61 could lead to a non-random distribution of false positive singleton calls and subsequently bias our  
62 analyses<sup>1,2</sup>. Allhoff et al. (2013)<sup>2</sup> reported context-specific errors for the Illumina HiSeq platform, noting  
63 that the most common of these are strand-specific T>X errors at 5'-GGGT-3' motifs (i.e., there is no  
64 evidence of an excess of A>X errors at the reverse complement 5'-ACCC-3' motifs). We reason that if  
65 the BRIDGES ERVs are enriched for such context-specific errors, we should see significantly more  
66 T>X ERVs at the 5'-GGGT-3' motif than A>X ERVs at the 5'-ACCC-3' motif. Of the 115,531 ERVs  
67 that occur at this motif, 57,699 were 5'-[A>X]CCC-3' variants, and 57,832 were 5'-GGG[T>X]-3'  
68 variants; this difference was not significant, indicating there is no evidence for an enrichment of T>X  
69 ERVs at this error-prone motif (exact binomial test; P=0.70). Allhoff et al. (2013) remark that the  
70 variants called at error-prone positions tended to have low base quality scores as well as significant  
71 strand bias, both of which are detectable with standard filtering protocols<sup>2</sup>. We therefore assume that  
72 most motif-specific errors are efficiently filtered by the default strand-bias and quality filters used in our  
73 variant calling pipeline, and any undetected errors have a negligible impact on our calculation of relative  
74 mutation rates and downstream analyses.

75

#### 76 **2). Mapping error**

77 We also considered the possibility that ERVs occurring on poorly mapped reads might bias our analysis  
78 of regional variation in mutation rates. We expect the majority of ERVs in our data are mapped with  
79 high confidence, as the pre-filtering steps in our variant calling pipeline remove sites with average  
80 phred-scaled mapping quality score (MQ) <20 and/or with more than 10% of reads that are  
81 ambiguously mapped (MQ0>10). This filtering strategy is similar to the filters employed by other large-  
82 scale sequencing projects that have demonstrated well-controlled error rates among singleton calls<sup>3,4</sup>.  
83 While a more aggressive mapping quality filter would reduce concerns about region-specific error

84 biases, doing so would primarily filter out ERVs occurring in repeat-rich pericentromeric regions<sup>5</sup> thus  
85 precluding our ability to assess the mutation spectrum in these regions. Prior research has found that  
86 centromeric and pericentromeric regions evolve more rapidly than elsewhere in the genome<sup>5-7</sup>, which is  
87 an intriguing phenomenon that would be entirely undetectable if we omit these regions from our  
88 analyses.

89

## 90 **Supplementary Note 2. Comparison of 7-mer relative mutation rates with** 91 **independent estimates**

92 Aggarwala & Voight (2016)<sup>8</sup> estimated “substitution rates” using 7,051,667 intergenic variants observed  
93 in N=379 Europeans from the 1000 Genomes Phase I study. These substitution rates are analogous to  
94 the relative mutation rates used in our study, but are derived from variants across the entire frequency  
95 spectrum, encompassing both singletons and common variants. The exact site frequency spectrum for  
96 the European intergenic variants is not reported, but Aggarwala & Voight (2016)<sup>8</sup> specify 26% of  
97 variants in the 1000G Phase I African sample are singletons or doubletons. Because the BRIDGES  
98 sample is ~10 times larger than the 1000G Phase I European sample, we expect many of the 1000G  
99 Phase I European singletons are present in the BRIDGES data in multiple individuals (i.e., non-  
100 singletons), and hence ancestrally older. The rates estimated by Aggarwala & Voight (2016)<sup>8</sup> are  
101 therefore expected to be more similar to the BRIDGES MAC10+-derived relative mutation rates than  
102 they are to the BRIDGES ERV-derived rates. As shown in **Supplementary Fig. 3a**, the BRIDGES  
103 MAC10+-derived rates are more strongly correlated with rates estimated by 1000 Genomes intergenic  
104 variants ( $r=0.995$ ) than with BRIDGES ERVs ( $r=0.991$ ). Type-specific correlations between MAC10+-  
105 derived and 1000G-derived rates are also higher for all types except A>G and non-CpG C>T transitions  
106 (**Supplementary Fig. 3b**). Only 129 of the 24,576 7-mer subtypes (0.5%) have more than a 2-fold  
107 difference between MAC10+-derived and 1000G-derived rates (**Supplementary Fig. 3c**), compared to  
108 741 (3%) of 7-mer subtypes with >2-fold difference between MAC10+-derived and ERV-derived rates.  
109 The rates estimated by Aggarwala & Voight (2016)<sup>8</sup> constitute a benchmark by which we compare our  
110 models’ ability to predict true *de novo* mutations; we show that our analogous model based on the

111 BRIDGES MAC10+-derived rates performs similarly to these previously published rates, and the  
112 models based on BRIDGES ERV-derived rates consistently predict *de novo* mutations with greater  
113 accuracy (**Supplementary Fig. 6**).

114

### 115 **Supplementary Note 3. Tests for enrichment/depletion of *de novo* mutations in** 116 **feature-associated subtypes.**

117 Our multivariate models identify specific 7-mer subtypes found to be enriched (or depleted) for ERVs  
118 when occurring in the presence of a genomic feature. While our model validation results demonstrate  
119 that accounting for these features in aggregate improves prediction of *de novo* mutations, it does not  
120 show that, for a given single feature, these subtype-specific effects could also be detected among  
121 actual *de novo* mutations. Because the available catalogs of *de novo* mutations are relatively sparse,  
122 validating each individual feature-associated 7-mer subtype is not feasible. Instead, we looked across  
123 all 7-mer subtypes associated with a given feature in the same direction, and tested if the *de novo*  
124 mutations of those subtypes were higher (or lower) than expected under the null assumption that a  
125 feature has no effect on those subtypes' mutability.

126 Hence, for each feature, we identified regions of the genome covered by that feature, and  
127 calculated the expected number of ERVs in those regions based on the 7-mer relative mutation rates  
128 (i.e., assuming the feature has no effect on mutability) of subtypes significantly associated in the same  
129 direction with the feature. Assuming no systematic bias, this number is proportional to the expected  
130 number of *de novo* mutations (e.g., if we expect 36,000 BRIDGES ERVs in those regions [0.1% of all  
131 ERVs], we would expect ~47 [0.1%] of the GoNL<sup>9</sup>/Inova<sup>10</sup> *de novo* mutations occur in the same  
132 regions). We compared the expected number to the observed number of *de novo* mutations using one-  
133 sided Pearson's Chi-squared tests, each with 1 degree of freedom (prop.test() function in R). A  
134 significant result indicates that observed counts of *de novo* mutations in the feature vary as predicted  
135 (higher or lower) from the expected count. Ten of the 15 tests showed a significant enrichment or

136 depletion of observed *de novo* mutations (**Supplementary Table 6a**). These results are not solely a  
137 result of feature-associated DNA methylation, as the associations remained significant when subtypes  
138 with CpG dinucleotides were excluded (**Supplementary Table 6b**). Note that four of the non-significant  
139 tests described in **Supplementary Table 6a** where we predicted an increase in *de novo* mutations had  
140 fewer observed *de novo* mutations than expected (CpG islands, GC content, H3K27me3, and lamin-  
141 associated domains). This may indicate false positive in our model, but is also consistent with This may  
142 a limited ability to confidently call *de novo* mutations in the GoNL/Inova datasets due to low coverage in  
143 GC-rich regions<sup>9,10</sup>. We conclude that most of the mutagenic effects of genomic features inferred by our  
144 model are likely operative in the germline and play a role in shaping mutation rate heterogeneity across  
145 the genome.

146

#### 147 **Supplementary Note 4. Potential mechanisms for TTAAAA hypermutability**

148 Our finding of a 3-fold depletion of TTAAAA AT>TA motifs in DNase hypersensitive sites provides an  
149 excellent example of how our results can be leveraged to better understand the origins of certain  
150 mutation patterns. We identify two possible mechanisms that might explain the context-dependent  
151 mutation probabilities of AT>TA mutations at TTAAAA hexamers. As described in the main text, L1 EN  
152 nicking activity has been shown to vary according to the nucleosomal context of its target motifs,  
153 usually occurring at a higher rate in nucleosome-free DNA, but in some cases actually decreasing in  
154 nucleosome-free DNA<sup>11</sup>. Therefore, under the L1 EN model, it is possible to see either a positive or  
155 negative association between TTAAAA mutability and DHS.

156 Slipped-strand mispairing, also known as replication slippage, is another plausible hypothesis  
157 for the hypermutability of this motif<sup>8</sup>. Because the nucleosomal architecture is disrupted ahead of the  
158 replication fork<sup>12</sup>, and reassembled almost immediately thereafter<sup>13</sup>, nascent DNA containing  
159 unresolved lesions that is packaged in nucleosomes could be inaccessible to mismatch repair  
160 machinery, thus preserving any errors caused by slippage. In this case, it is also possible to see a  
161 negative association between TTAAAA mutability and DHS.

162           This slippage mechanism, however, appears to be unlikely for the following reasons. First,  
163 replication slippage inherently results in short insertions or deletions rather than point mutations.  
164 Mapping error could potentially cause an insertion/deletion to be falsely identified as a single-nucleotide  
165 variant, but such errors would need to be extremely prevalent in our data (and also context-dependent)  
166 in order to observe a 3-fold depletion of these singletons in DHS. Given the quality metrics we report for  
167 the BRIDGES singletons, it seems unlikely that these results are purely a technical artifact.  
168 Furthermore, if slippage were the primary mechanism, we would expect other motifs ending in poly-A 4-  
169 mers to also show an inverse association with DHS. Among the 13 NNNAAAA subtypes whose  
170 mutability is significantly associated with DHS, only five are inversely associated, three of which are  
171 NNTAAAA motifs (i.e., conforming closely to the canonical target for L1 EN nicking activity). The other  
172 eight subtypes all show *higher* mutation rates in DHS, which conflicts with the proposed  
173 slippage+chromatinization mechanism.

174

175

176 **Supplementary Note 5. Derivation of false discovery rate by Ts/Tv statistics**

177 (1) Let  $TS_o = TS_{tp} + TS_{fp}$  be the number of observed transitions, consisting of both true positives

178 ( $TS_{tp}$ ), and false positives ( $TS_{fp}$ )

179 (2) Let  $TV_o = TV_{tp} + TV_{fp}$  be the number of observed transversions.

180 (3) Based on findings from other large-scale sequencing studies, the true positive Ts/Tv ratio,

181  $TSTV_T = \frac{TS_{tp}}{TV_{tp}}$  is between 2.0 and 2.1<sup>14</sup>.

182 (4) Because there are 8 possible transversions and 4 possible transitions, if errors are occurring at

183 random, the Ts/Tv ratio for random false positive errors ( $TSTV_\epsilon$ ) should be 0.5, that is,  $\frac{TS_{fp}}{TV_{fp}} =$

184 0.5.

185 Solving this system of four equations, it follows that  $TV_{fp} = \frac{TSTV_T \times TV_o - TS_o}{TSTV_T - 0.5}$  and  $TS_{fp} = 0.5 \times TV_{fp}$ , so the

186 false discovery rate is estimated as:

187 
$$\frac{TS_{fp} + TV_{fp}}{TS_o + TV_o} = \frac{0.5 \left( \frac{TSTV_T \times TV_o - TS_o}{TSTV_T - 0.5} \right) + \frac{TSTV_T \times TV_o - TS_o}{TSTV_T - 0.5}}{TS_o + TV_o}$$

188 Assuming a true  $TSTV_T$  between 2.0 and 2.1, we estimate a false discovery rate of 0.6-2.6% among the

189 BRIDGES ERVs.

190



191 **Acknowledgements**

192 The BRIDGES study was supported by R01 MH094145 to Michael Boehnke and Richard M. Myers and  
193 U01 MH105653 to Michael Boehnke. The collection and storage of cases and controls from the Centre  
194 for Addiction and Mental Health (CAMH) in Toronto and from the Institute of Psychiatry, Psychology  
195 and Neuroscience (IoPPN), King's College London in London, U.K. was supported by funding from  
196 GlaxoSmithKline, from the Canadian Institutes of Health Research to John B. Vincent, MOP-172013  
197 (CAMH), and funding from the National Institute for Health Research (NIHR) Biomedical Research  
198 Centre at South London and Maudsley NHS Foundation Trust and King's College London (IoPPN). The  
199 views expressed are those of the author(s) and not necessarily those of the UK NHS, the NIHR or the  
200 UK Department of Health. Case and control collection was supported by Heinz C. Prechter Bipolar  
201 Research Fund at the University of Michigan Depression Center to Melvin G. McClinnis (Prechter). Data  
202 and biomaterials were collected for the Systematic Treatment Enhancement Program for Bipolar  
203 Disorder (STEP-BD), a multi-center, longitudinal project selected from responses to RFP #NIMH-98-  
204 DS-0001, "Treatment for Bipolar Disorder" which was led by Gary Sachs and coordinated by  
205 Massachusetts General Hospital in Boston, MA with support from 2N01 MH080001-001. The Genomic  
206 Psychiatric Cohort wishes to acknowledge all of the research participants in this cohort; the study was  
207 supported by U01 MH105641, R01 MH085548, R01MH104964. The MCTFR study was supported  
208 through grants from the National Institutes of Health DA037904, DA024417, DA036216, DA05147,  
209 AA09367, DA024417, HG007022, and HL117626.

210

211 **References**

- 212 1. Minoche, A., Dohm, J. & Himmelbauer, H. Evaluation of genomic high-throughput sequencing  
213 data generated on Illumina HiSeq and Genome Analyzer systems. *Genome Biol.* **12**, R112  
214 (2011).
- 215 2. Allhoff, M. *et al.* Discovering motifs that induce sequencing errors. *BMC Bioinformatics* **14 Suppl**  
216 **5**, S1 (2013).
- 217 3. Lek, M. *et al.* Analysis of protein-coding genetic variation in 60,706 humans. *Nature* **536**, 285–  
218 291 (2016).
- 219 4. Walter, K. *et al.* The UK10K project identifies rare variants in health and disease. *Nature* **526**,  
220 82–90 (2015).
- 221 5. Horvath, J. E. *et al.* Molecular structure and evolution of an alpha satellite/non-alpha satellite  
222 junction at 16p11. *Hum. Mol. Genet.* **9**, 113–23 (2000).
- 223 6. Dover, G. A. Evolution of genetic redundancy for advanced players. *Curr. Opin. Genet. Dev.* **3**,  
224 902–910 (1993).
- 225 7. Bensasson, D. Evidence for a high mutation rate at rapidly evolving yeast centromeres. *BMC*  
226 *Evol. Biol.* **11**, 211 (2011).
- 227 8. Aggarwala, V. & Voight, B. F. An expanded sequence context model broadly explains variability  
228 in polymorphism levels across the human genome. *Nat. Genet.* **48**, 349–55 (2016).
- 229 9. Francioli, L. C. *et al.* Genome-wide patterns and properties of de novo mutations in humans. *Nat.*  
230 *Genet.* **47**, 822–826 (2015).
- 231 10. Goldmann, J. M. *et al.* Parent-of-origin-specific signatures of de novo mutations. *Nat. Genet.* **48**,  
232 935–939 (2016).
- 233 11. Cost, G. J., Golding, A., Schlissel, M. S. & Boeke, J. D. Target DNA chromatinization modulates  
234 nicking by L1 endonuclease. *Nucleic Acids Res.* **29**, 573–577 (2001).
- 235 12. Groth, A., Rocha, W., Verreault, A. & Almouzni, G. Chromatin Challenges during DNA  
236 Replication and Repair. *Cell* **128**, 721–733 (2007).
- 237 13. Leman, A. R. & Noguchi, E. The replication fork: understanding the eukaryotic replication  
238 machinery and the challenges to genome duplication. *Genes (Basel)*. **4**, 1–32 (2013).
- 239 14. DePristo, M. A. *et al.* A framework for variation discovery and genotyping using next-generation  
240 DNA sequencing data. *Nat. Genet.* **43**, 491–8 (2011).
- 241 15. Consortium, R. E. *et al.* Integrative analysis of 111 reference human epigenomes. *Nature* **518**,  
242 317–330 (2015).
- 243 16. Koren, A. *et al.* Differential relationship of DNA replication timing to different forms of human  
244 mutation and variation. *Am. J. Hum. Genet.* **91**, 1033–1040 (2012).
- 245 17. Kong, A. *et al.* Fine-scale recombination rate differences between sexes, populations and  
246 individuals. *Nature* **467**, 1099–1103 (2010).
- 247 18. Guelen, L. *et al.* Domain organization of human chromosomes revealed by mapping of nuclear  
248 lamina interactions. *Nature* **453**, 948–51 (2008).
- 249 19. Wu, H., Caffo, B., Jaffee, H. A., Irizarry, R. A. & Feinberg, A. P. Redefining CpG islands using  
250 hidden Markov models. *Biostatistics* **11**, 499–514 (2010).

252  
253

## Supplementary Figures

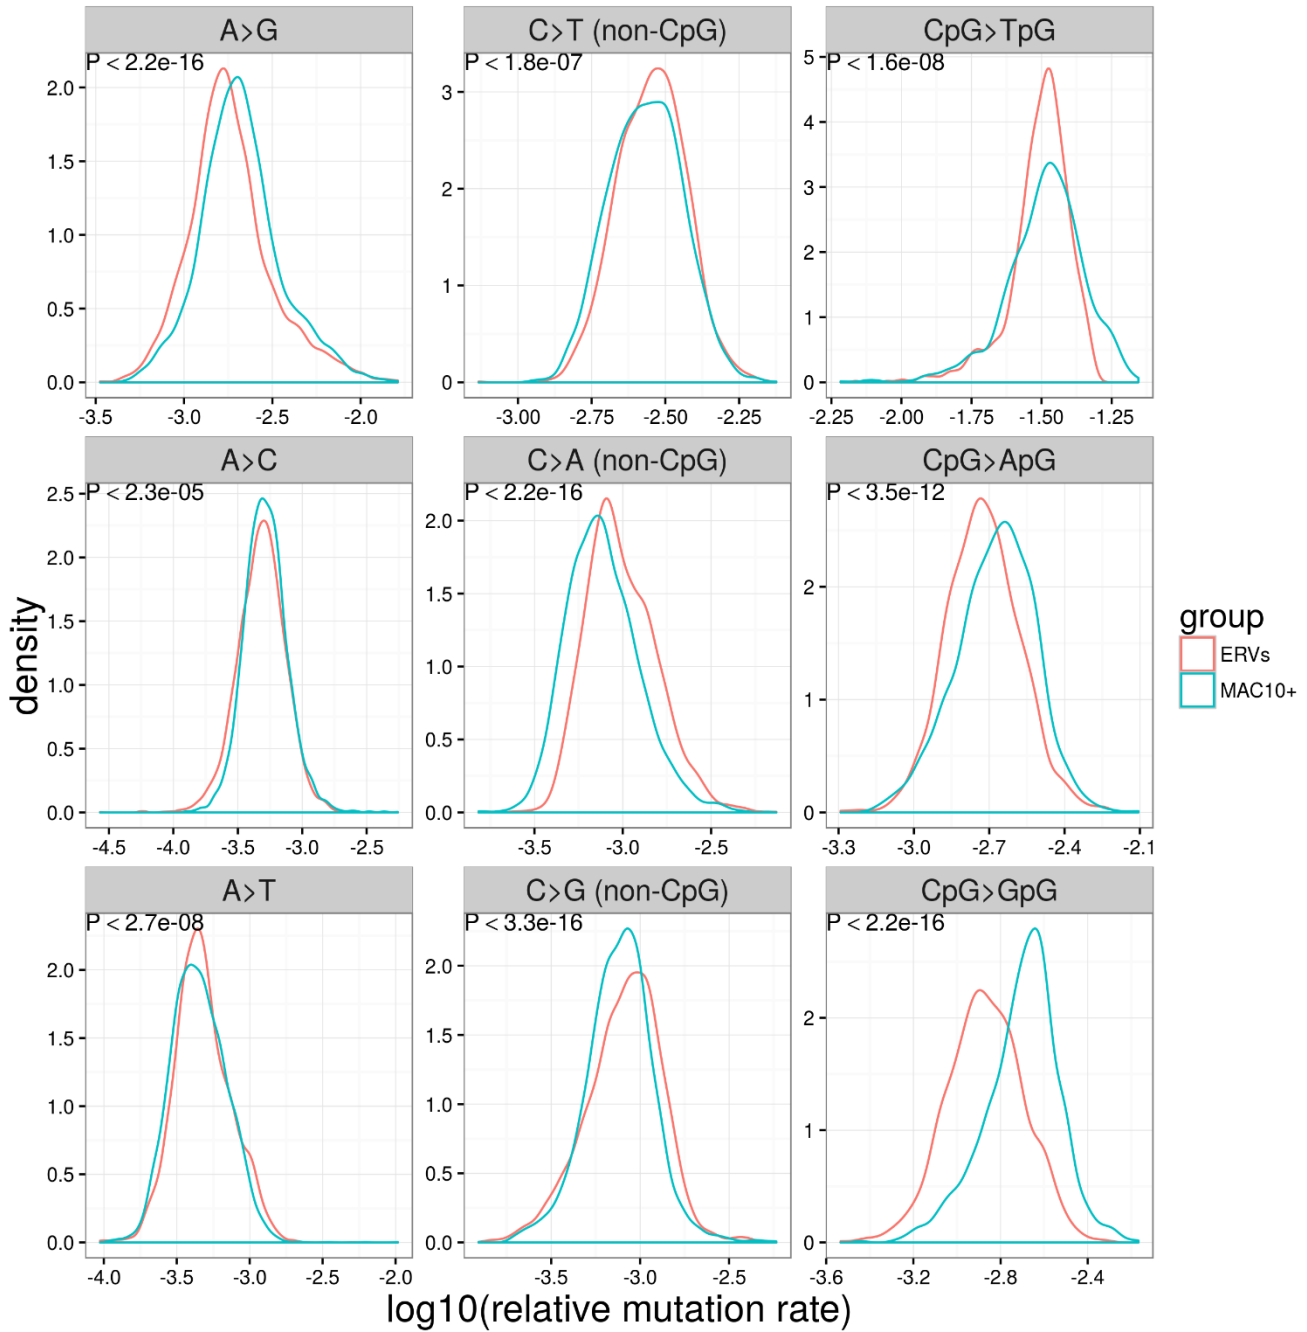

254

### 255 Supplementary Figure 1

256 Densities of  $\log_{10}$ -scaled 7-mer relative mutation rates, estimated using the downsampled BRIDGES  
257 ERVs (red) and BRIDGES MAC10+ variants (blue). P-values from the Kolmogorov-Smirnov test for  
258 distributional equivalence are shown in the upper left corner of each panel.  
259

260

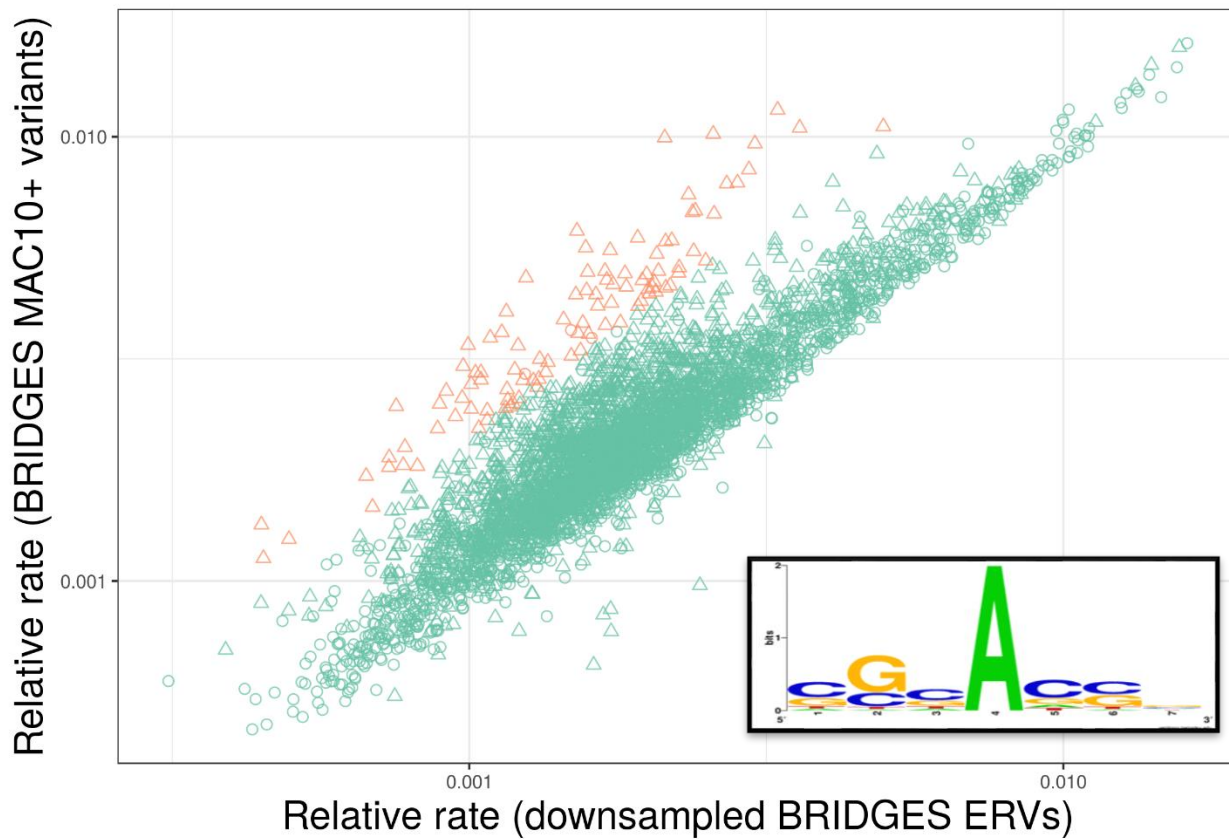

#G/C bases in flanking region   ○ <4   △ >=4   MAC10+:ERV ratio   ● <2   ● >2

261

262 **Supplementary Figure 2** Detailed comparison between ERV-derived and MAC10+-derived A>G  
 263 transition rates. Points are colored by the ratio between the two rates for that subtype (orange:  
 264 MAC10+:ERV>2; green: MAC10+:ERV<2). The shape of each point indicates the number of G or C  
 265 bases in the +/-3 nucleotides flanking the variant site. Among the 103 7-mer motifs with a  
 266 MAC10+:ERV ratio >2, 100 have 4 or more G/C bases in the flanking region. **(inset)** Sequence logo for  
 267 these 103 7-mer subtypes with MAC10+:ERV ratio >2 shows flanking regions are enriched for G/C  
 268 bases.  
 269

270

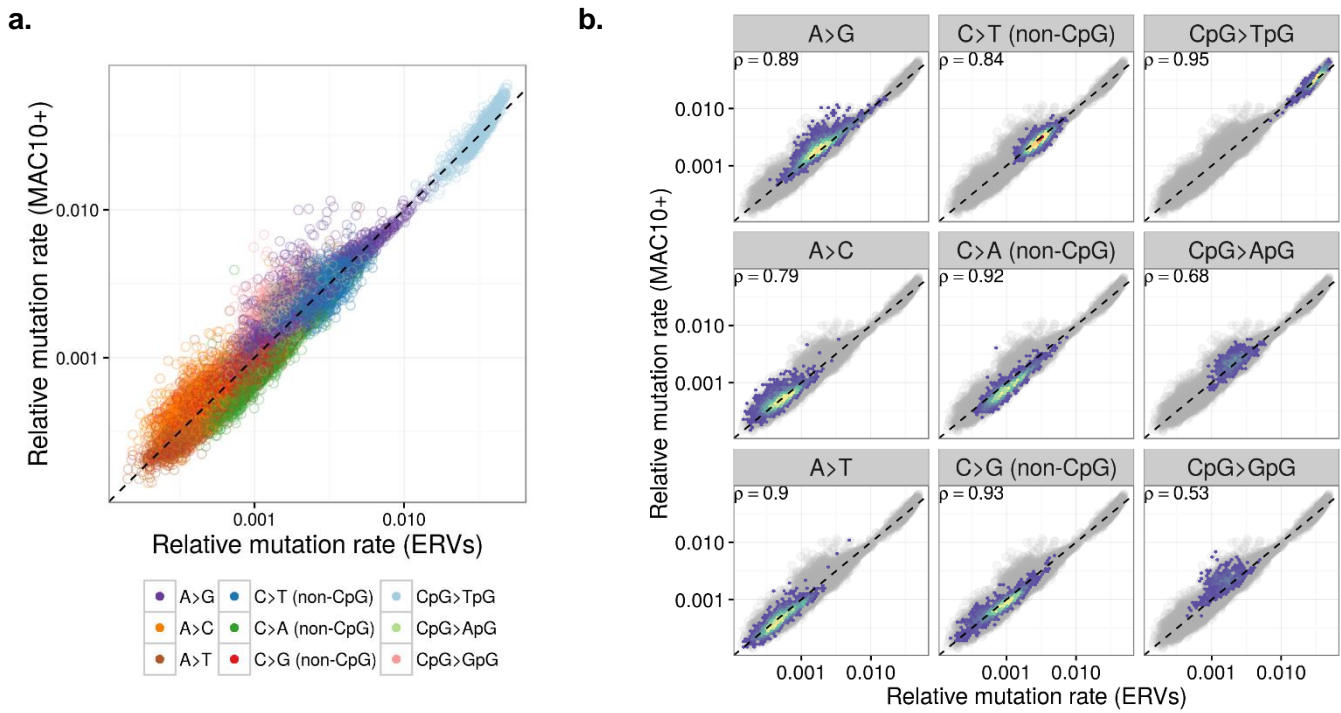

289

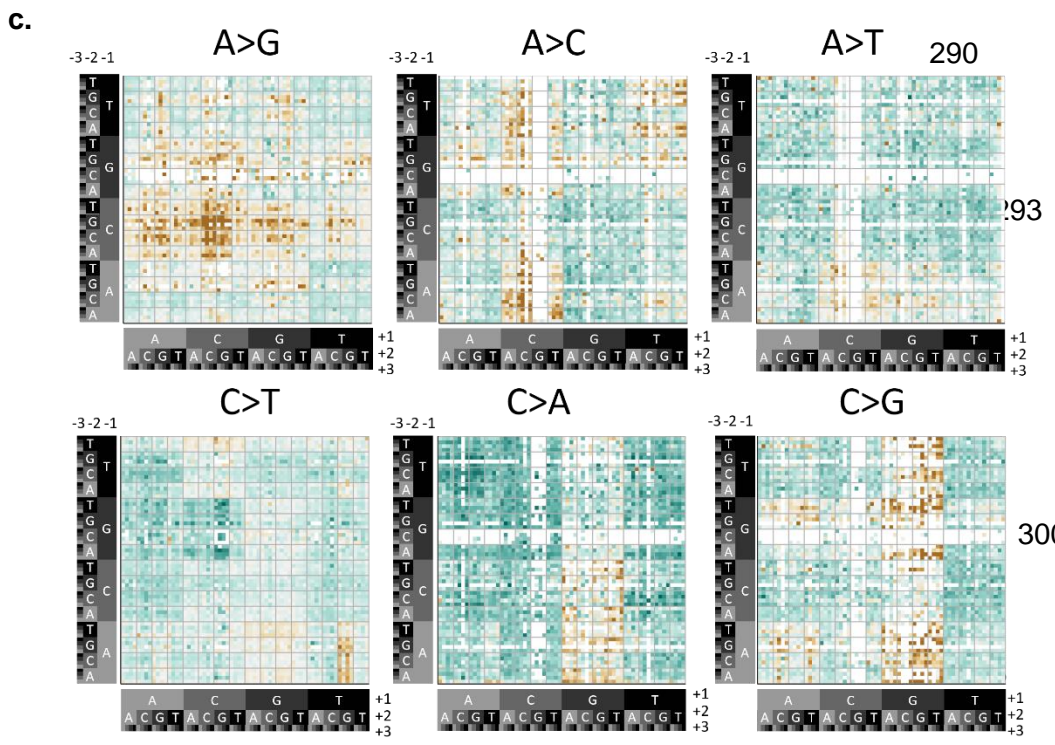

296

304

### 305 Supplementary Figure 3

306 **(a)** Relationship between 7-mer relative mutation rates estimated using down-sampled BRIDGES ERVs  
 307 (x-axis) and variants with a minor allele count  $\geq 10$  (MAC10+; y-axis), excluding subtypes with  $< 50$   
 308 variants in either dataset. **(b)** Type-specific 2D-density plots, as situated in the scatterplot of **a**. The  
 309 dashed line indicates an expected least-squares regression line if there is no bias present. **(c)** Heatmap  
 310 shows ratio between relative mutation rates calculated on MAC10+ variants and ERVs for each 7-mer  
 311 mutation subtype. Subtypes with higher MAC10+-derived rates relative to ERV-derived rates are  
 312 shaded gold, and subtypes with lower MAC10+-derived rates relative to ERV-derived rates are shaded  
 313 green.



a.

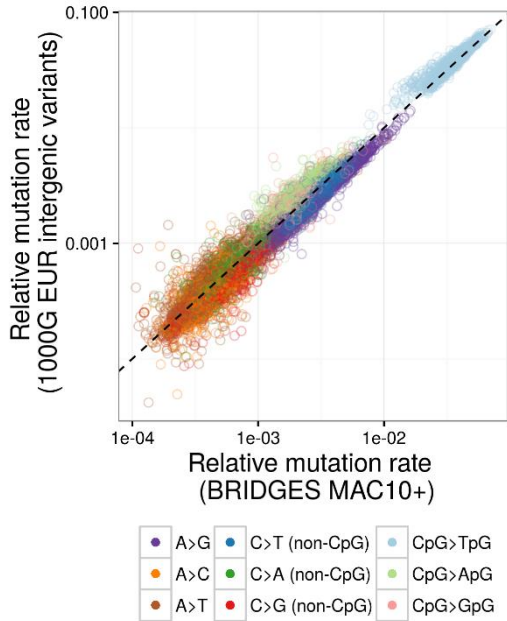

b.

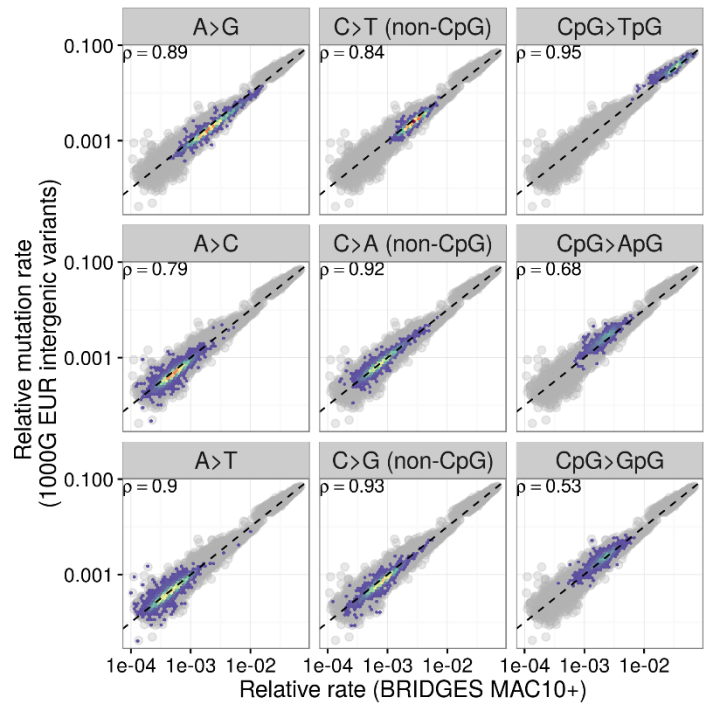

c.

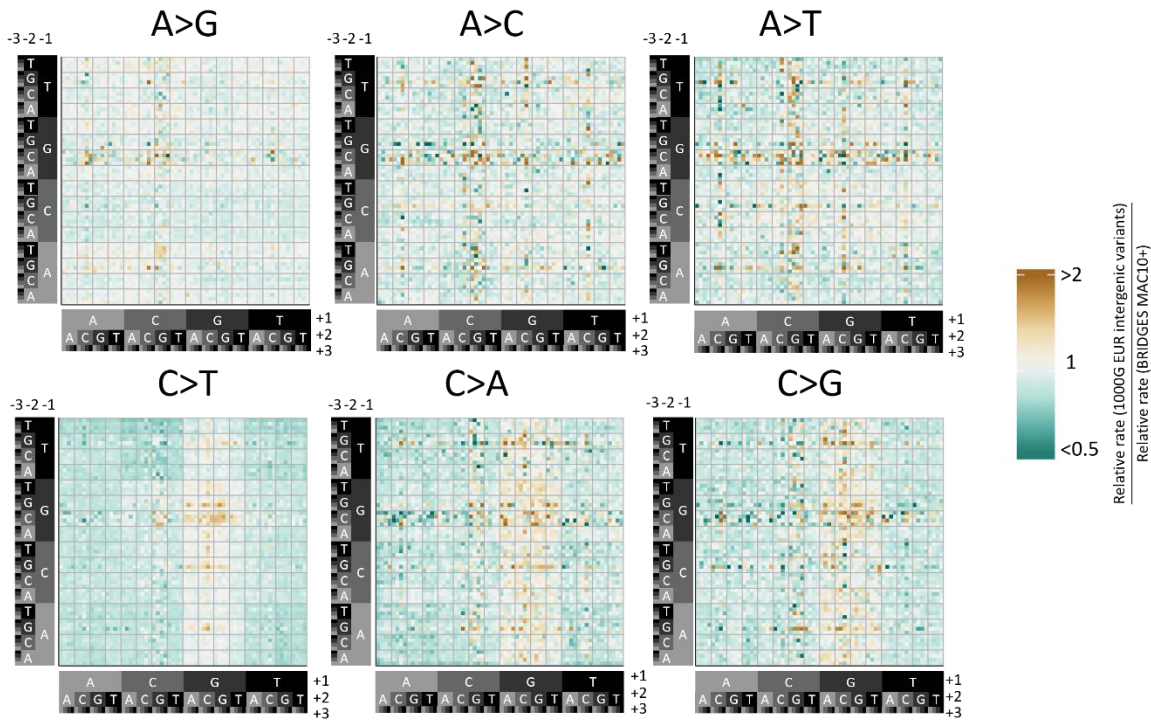333  
334

335

336

337

338

339

340

341

342

343

344

345

346

347

348

349

### Supplementary Figure 4

350

351

352

353

354

355

356

357

358

(a) Relationship between 7-mer relative mutation rates estimated using BRIDGES variants with a minor allele count  $\geq 10$  (MAC10+; x-axis), and 7-mer rates calculated from intergenic variants in the European 1000G phase I sample (y-axis) (b) Type-specific 2D-density plots, as situated in the scatterplot of a. The dashed line indicates an expected least-squares regression line if there is no bias present. (c) Heatmap shows ratio between relative mutation rates calculated on MAC10+ variants and 1000G variants for each 7-mer mutation subtype. Subtypes with higher 1000G-derived rates relative to MAC10+-derived rates are shaded gold, and subtypes with lower 1000G-derived rates relative to MAC10+-derived rates are shaded green. 1000G-derived rates shown here are scaled relative to the MAC10+-derived rates.

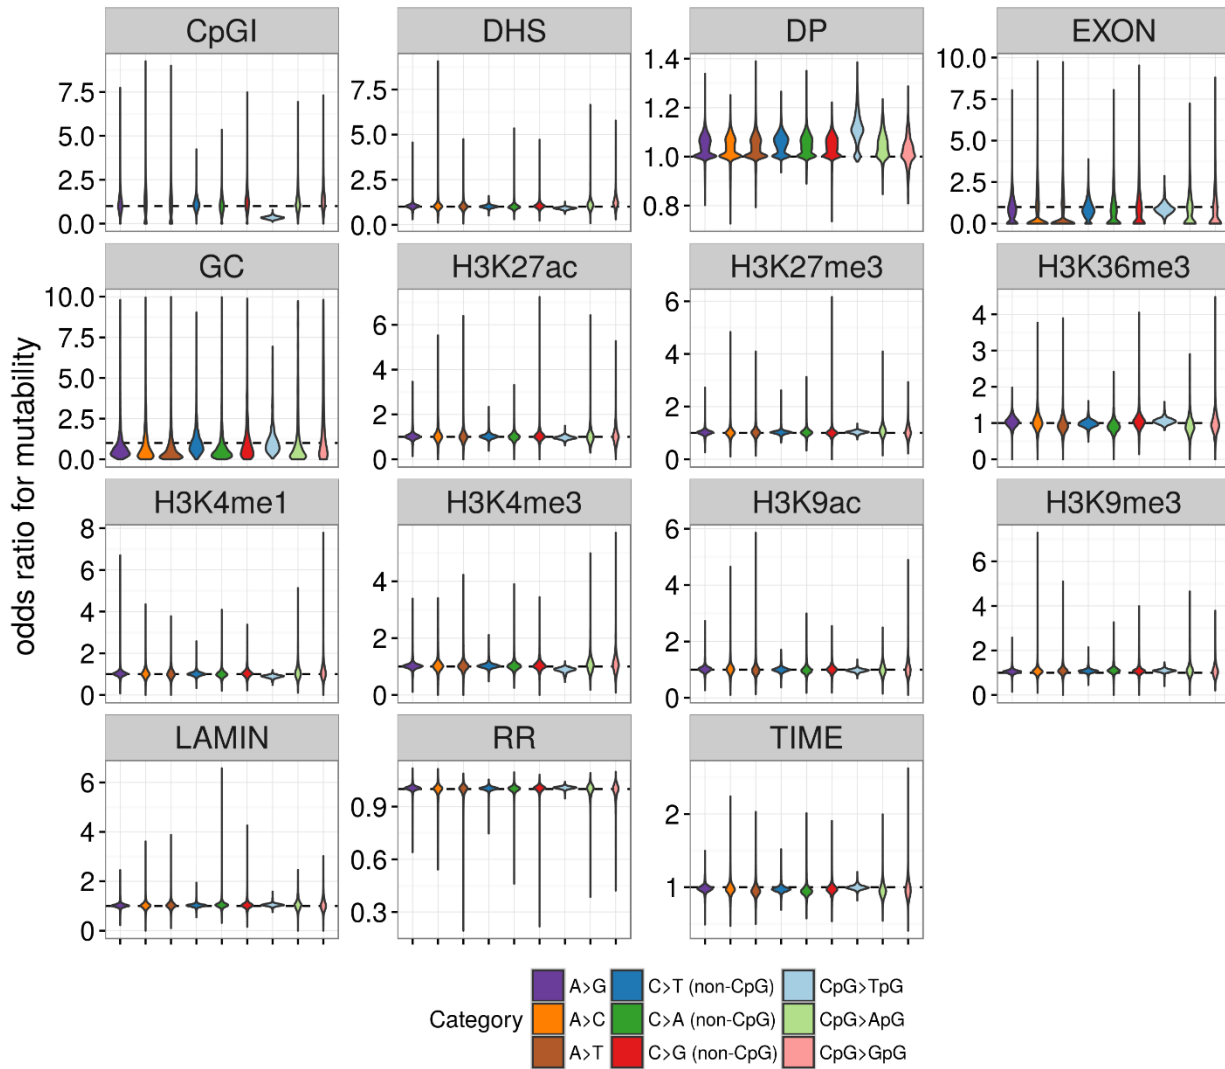

360  
361  
362  
363  
364  
365  
366  
367

**Supplementary Figure 5** Distributions of effect sizes (including non-significant effects) on mutability for the 14 genomic features considered in the logistic regression model. For each feature, we plotted the empirical distributions of these subtype-specific odds ratios for each basic mutation type. \*Replication timing is coded with negative values indicating later replicating regions, so an OR<1 means mutation rate increases in late-replicating regions. Note that effects in CpG islands are shown on a wider scale than other features.

368

**a.**

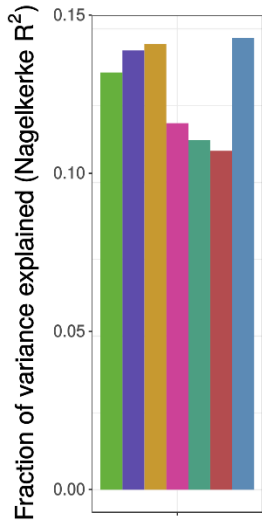

**b.**

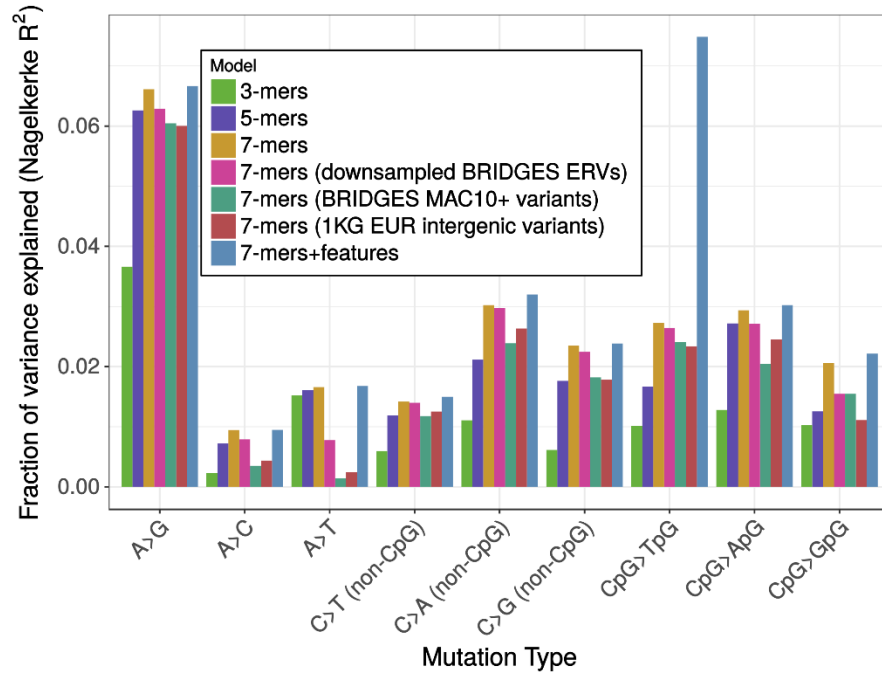

369

370

371

372

**Supplementary Figure 6** Comparison of variance explained by all models for **(a)** all mutation types combined, and **(b)** stratified by mutation type.



373 **Supplementary Tables**

374

375 **Supplementary Table 1 Quality comparison between filtered partitions**  
 376 **of BRIDGES singletons**

| Partition                                                  | # Singletons | Ts/Tv ratio | %dbSNP (b142) | % of Full Set |
|------------------------------------------------------------|--------------|-------------|---------------|---------------|
| Full Set                                                   | 36,087,319   | 2.02        | 17.4          | 100           |
| Filter 1 (QUAL $\geq$ 30)*                                 | 20,796,900   | 2.03        | 17.8          | 58            |
| Filter 2 (MQ $>$ 56)                                       | 33,550,098   | 2.01        | 17.3          | 93            |
| Filter 3 (passed 1000G strict mask)                        | 28,958,837   | 1.94        | 17.5          | 80            |
| All Filters (MQ $>$ 56, QUAL $\geq$ 30, 1000G strict mask) | 16,535,856   | 2.00        | 17.6          | 46            |

377 *\*Quality score cutoff uses raw base quality scores obtained prior to recalibration.*

378

379 **Supplementary Tables 2a-2d Relative mutation rate estimates for 1-mers, 3-mers, 5-mers,**  
 380 **and 7-mers**

381 [see separate spreadsheet, table\_S2\_K-mer\_relative\_rates.xlsx]

382 Each table contains data used to calculate relative mutation rates for K-mers of a given length. Each  
 383 row in the table contains the following columns: 1) basic mutation type; 2) K-mer motif corresponding to  
 384 a reference base A or C at the central mutated position (the reverse complement of each motif,  
 385 corresponding to reference base T or G is given in parentheses); 3) number of singletons observed in  
 386 the BRIDGES data of the K-mer subtype defined by columns 1 and 2; 4) total number of times the motif  
 387 in column 2 is observed in the reference genome; 5) relative mutation rate of singletons in that subtype  
 388 (column 3 divided by column 4). For 7-mer subtypes (Supplementary Table 2d), we include four  
 389 additional columns: 6) number of singletons in that subtype, after downsampling to 12M; 7) relative  
 390 mutation rate of downsampled singletons in that subtype (column 6 divided by column 4); 8) number of  
 391 MAC10+ variants observed in the BRIDGES data of that subtype; 9) relative mutation rate of  
 392 polymorphisms of that subtype (column 8 divided by column 4).

393

Supplementary Table 3a Summary of overall model fit statistics for *de novo* testing data

| Model                                                   | Nagelkerke's<br>$R^2$ | AIC             | P-value<br>(likelihood<br>ratio test) |
|---------------------------------------------------------|-----------------------|-----------------|---------------------------------------|
| 1-mers                                                  | 0.082 (0.082)         | 326076 (326076) | --                                    |
| 3-mers                                                  | 0.136 (0.111)         | 309619 (317089) | <2.2e-308                             |
| 5-mers                                                  | 0.143 (0.117)         | 307405 (315331) | <2.2e-308                             |
| 7-mers                                                  | 0.145 (0.119)         | 306738 (314705) | 1.56e-148                             |
| 7-mers+features                                         | 0.147 (0.119)         | 306146 (314943) | 3.08e-147                             |
| 7-mers (downsampled<br>BRIDGES ERVs)                    | 0.119                 | 314723          | --                                    |
| 7-mers (BRIDGES MAC10+<br>variants)                     | 0.114                 | 316400          | --                                    |
| 7-mers (intergenic 1000G<br>polymorphisms) <sup>b</sup> | 0.110                 | 317490          | --                                    |

395 Due to the nested structure of the first 5 models in this table (described in **Materials and Methods**),  
396 Nagelkerke's  $R^2$  is slightly biased upwards for models with more parameters. For a more direct  
397 comparison with the other 3 models, we repeated each these models with only 1 composite predictor  
398 (as was done for the downsampled ERV, MAC10+, and 1KG polymorphism models), and we include  
399 Nagelkerke's  $R^2$  and AIC values for these models in parentheses. Note that the relative differences in  
400 Nagelkerke's  $R^2$  between non-nested K-mer and (K+2)-mer models are nearly identical to what we  
401 observe in the nested modeling framework. Also, because all models are applied to the same testing  
402 data, AIC is a valid means of comparison between all models, regardless of number of predictors; the  
403 nested 7-mer+features model achieves the lowest AIC, indicating this model provides the best overall  
404 fit. The last column of P-values come from likelihood ratio test between each nested model and the  
405 corresponding model in the preceding row, where such nested models exist.

406

407

408 **Supplementary Table 3b Summary of type-specific model fit statistics for *de novo* testing**  
 409 **data. Each type is shown in a sub-table, with the number of *de novo* mutations and non-mutated**  
 410 **sites used in the partitioned testing data indicated in the subheading.**

411  
 412 **A>C (2920 *de novo* mutations; 198481 non-mutated sites)**

| Model                                                | Nagelkerke's R <sup>2</sup> | AIC   | P-value<br>(likelihood ratio test) |
|------------------------------------------------------|-----------------------------|-------|------------------------------------|
| 3-mers                                               | 0.0023                      | 30447 | --                                 |
| 5-mers                                               | 0.0072                      | 30309 | 4.20e-32                           |
| 7-mers                                               | 0.0094                      | 30248 | 1.94e-15                           |
| 7-mers+features                                      | 0.0095                      | 30249 | 0.385                              |
| 7-mers (downsampled BRIDGES ERVs)                    | 0.0079                      | 30288 | --                                 |
| 7-mers (BRIDGES MAC10+ variants)                     | 0.0035                      | 30413 | --                                 |
| 7-mers (intergenic 1000G polymorphisms) <sup>8</sup> | 0.0043                      | 30388 | --                                 |

413  
 414 **A>G (11400 *de novo* mutations; 198793 non-mutated sites)**

| Model                                                | Nagelkerke's R <sup>2</sup> | AIC   | P-value<br>(likelihood ratio test) |
|------------------------------------------------------|-----------------------------|-------|------------------------------------|
| 3-mers                                               | 0.037                       | 85999 | --                                 |
| 5-mers                                               | 0.063                       | 84087 | <2.2e-308                          |
| 7-mers                                               | 0.066                       | 83829 | 2.22e-58                           |
| 7-mers+features                                      | 0.067                       | 83792 | 3.68e-10                           |
| 7-mers (downsampled BRIDGES ERVs)                    | 0.063                       | 84065 | --                                 |
| 7-mers (BRIDGES MAC10+ variants)                     | 0.060                       | 84244 | --                                 |
| 7-mers (intergenic 1000G polymorphisms) <sup>8</sup> | 0.060                       | 84278 | --                                 |

415  
 416 **A>T (2455 *de novo* mutations; 198320 non-mutated sites)**

| Model                                                | Nagelkerke's R <sup>2</sup> | AIC   | P-value<br>(likelihood ratio test) |
|------------------------------------------------------|-----------------------------|-------|------------------------------------|
| 3-mers                                               | 0.015                       | 26123 | --                                 |
| 5-mers                                               | 0.016                       | 26103 | 3.27e-06                           |
| 7-mers                                               | 0.017                       | 26092 | 3.16e-04                           |
| 7-mers+features                                      | 0.017                       | 26090 | 0.038                              |
| 7-mers (downsampled BRIDGES ERVs)                    | 0.008                       | 26307 | --                                 |
| 7-mers (BRIDGES MAC10+ variants)                     | 0.001                       | 26466 | --                                 |
| 7-mers (intergenic 1000G polymorphisms) <sup>8</sup> | 0.002                       | 26440 | --                                 |

417  
 418 **non-CpG C>A (3620 *de novo* mutations; 128765 non-mutated sites)**

| Model                                                | Nagelkerke's R <sup>2</sup> | AIC   | P-value<br>(likelihood ratio test) |
|------------------------------------------------------|-----------------------------|-------|------------------------------------|
| 3-mers                                               | 0.011                       | 32901 | --                                 |
| 5-mers                                               | 0.021                       | 32606 | 9.73e-67                           |
| 7-mers                                               | 0.030                       | 32340 | 3.75e-60                           |
| 7-mers+features                                      | 0.032                       | 32290 | 4.60e-13                           |
| 7-mers (downsampled BRIDGES ERVs)                    | 0.030                       | 32351 | --                                 |
| 7-mers (BRIDGES MAC10+ variants)                     | 0.024                       | 32523 | --                                 |
| 7-mers (intergenic 1000G polymorphisms) <sup>8</sup> | 0.026                       | 32451 | --                                 |

419 **non-CpG C>G (3561 *de novo* mutations; 128746 non-mutated sites)**

| Model                                                | Nagelkerke's R <sup>2</sup> | AIC   | P-value<br>(likelihood<br>ratio test) |
|------------------------------------------------------|-----------------------------|-------|---------------------------------------|
| 3-mers                                               | 0.006                       | 32603 | --                                    |
| 5-mers                                               | 0.018                       | 32271 | 1.25e-75                              |
| 7-mers                                               | 0.023                       | 32102 | 4.79e-39                              |
| 7-mers+features                                      | 0.024                       | 32093 | 1.10e-03                              |
| 7-mers (downsampled BRIDGES ERVs)                    | 0.022                       | 32127 | --                                    |
| 7-mers (BRIDGES MAC10+ variants)                     | 0.018                       | 32251 | --                                    |
| 7-mers (intergenic 1000G polymorphisms) <sup>8</sup> | 0.018                       | 32263 | --                                    |

420 **non-CpG C>T (10321 *de novo* mutations; 128774 non-mutated sites)**

| Model                                                | Nagelkerke's R <sup>2</sup> | AIC   | P-value<br>(likelihood<br>ratio test) |
|------------------------------------------------------|-----------------------------|-------|---------------------------------------|
| 3-mers                                               | 0.006                       | 73240 | --                                    |
| 5-mers                                               | 0.012                       | 72902 | 5.40e-76                              |
| 7-mers                                               | 0.014                       | 72771 | 9.49e-31                              |
| 7-mers+features                                      | 0.015                       | 72728 | 1.92e-11                              |
| 7-mers (downsampled BRIDGES ERVs)                    | 0.014                       | 72779 | --                                    |
| 7-mers (BRIDGES MAC10+ variants)                     | 0.012                       | 72905 | --                                    |
| 7-mers (intergenic 1000G polymorphisms) <sup>8</sup> | 0.013                       | 72863 | --                                    |

422 **CpG>ApG (304 *de novo* mutations; 6108 non-mutated sites)**

| Model                                                | Nagelkerke's R <sup>2</sup> | AIC  | P-value<br>(likelihood<br>ratio test) |
|------------------------------------------------------|-----------------------------|------|---------------------------------------|
| 3-mers                                               | 0.013                       | 2424 | --                                    |
| 5-mers                                               | 0.027                       | 2397 | 5.82e-08                              |
| 7-mers                                               | 0.029                       | 2394 | 3.43e-02                              |
| 7-mers+features                                      | 0.030                       | 2395 | 0.18                                  |
| 7-mers (downsampled BRIDGES ERVs)                    | 0.027                       | 2395 | --                                    |
| 7-mers (BRIDGES MAC10+ variants)                     | 0.020                       | 2408 | --                                    |
| 7-mers (intergenic 1000G polymorphisms) <sup>8</sup> | 0.024                       | 2400 | --                                    |

424 **CpG>GpG (270 *de novo* mutations; 6292 non-mutated sites)**

| Model                                                | Nagelkerke's R <sup>2</sup> | AIC  | P-value<br>(likelihood<br>ratio test) |
|------------------------------------------------------|-----------------------------|------|---------------------------------------|
| 3-mers                                               | 0.010                       | 2218 | --                                    |
| 5-mers                                               | 0.013                       | 2216 | 0.037                                 |
| 7-mers                                               | 0.021                       | 2203 | 9.90e-05                              |
| 7-mers+features                                      | 0.022                       | 2202 | 0.083                                 |
| 7-mers (downsampled BRIDGES ERVs)                    | 0.015                       | 2208 | --                                    |
| 7-mers (BRIDGES MAC10+ variants)                     | 0.015                       | 2208 | --                                    |
| 7-mers (intergenic 1000G polymorphisms) <sup>8</sup> | 0.011                       | 2217 | --                                    |

426

427 **CpG>TpG (6960 *de novo* mutations; 6289 non-mutated sites)**

| <b>Model</b>                                         | <b>Nagelkerke's R<sup>2</sup></b> | <b>AIC</b> | <b>P-value<br/>(likelihood<br/>ratio test)</b> |
|------------------------------------------------------|-----------------------------------|------------|------------------------------------------------|
| 3-mers                                               | 0.010                             | 18067      | --                                             |
| 5-mers                                               | 0.017                             | 18005      | 8.36e-16                                       |
| 7-mers                                               | 0.027                             | 17900      | 7.45e-25                                       |
| 7-mers+features                                      | 0.075                             | 17415      | 7.23e-108                                      |
| 7-mers (downsampled BRIDGES ERVs)                    | 0.026                             | 17905      | --                                             |
| 7-mers (BRIDGES MAC10+ variants)                     | 0.024                             | 17928      | --                                             |
| 7-mers (intergenic 1000G polymorphisms) <sup>8</sup> | 0.024                             | 17935      | --                                             |

428

429  
430

**Supplementary Table 4 t-tests for differences in mean MAC10+/ERV ratio of GC-poor vs. GC-rich 7-mer motifs**

| Type          | Mean MAC10+/ERV ratio<br>( $\leq 3$ C/G bases) | Mean MAC10+/ERV ratio<br>( $\geq 4$ C/G bases) | P-value   |
|---------------|------------------------------------------------|------------------------------------------------|-----------|
| A>C           | 0.97                                           | 1.12                                           | 8.00e-30  |
| A>G           | 1.00                                           | 1.28                                           | 2.37e-161 |
| A>T           | 0.89                                           | 0.89                                           | 0.81      |
| C>A (non-CpG) | 0.76                                           | 0.72                                           | 2.61e-09  |
| C>G (non-CpG) | 0.89                                           | 0.93                                           | 2.98e-04  |
| C>T (non-CpG) | 0.93                                           | 0.85                                           | 1.75e-39  |
| CpG>ApG       | 1.15                                           | 0.96                                           | 4.97e-22  |
| CpG>GpG       | 1.46                                           | 1.33                                           | 2.80e-04  |
| CpG>TpG       | 1.02                                           | 0.98                                           | 1.01e-09  |

431  
432  
433  
434

For each mutation subtype, we calculated the ratio between MAC10+-derived and ERV-derived relative mutation rates. Then, for each of the 9 basic types, we grouped 7-mer subtypes into low C/G subtypes ( $\leq 3$  C/G bases in the +/-3 flanking positions) and high C/G subtypes ( $\geq 4$  C/G bases in the +/-3 flanking positions) and performed t-tests for differences in the mean MAC10+/ERV ratios of these two groups.

435 **Supplementary Table 5 Genomic features used in mutation models**

| <b>Feature</b>                                                 | <b>Source</b>                                                                   | <b>Cell Type</b>                               | <b>Resolution</b>                      |
|----------------------------------------------------------------|---------------------------------------------------------------------------------|------------------------------------------------|----------------------------------------|
| H3K4me1, H3K4me3, H3K9ac, H3K9me3, H3K27ac, H3K27me3, H3K36me3 | Roadmap Epigenomics Project <sup>15</sup>                                       | Peripheral Blood Mononuclear Primary Cells     | 1bp (inside vs. outside of broad peak) |
| Replication timing                                             | Koren et al., 2012 <sup>16</sup>                                                | Lymphoblastoid                                 | 1kb window                             |
| Recombination rate                                             | Kong et al., 2010 <sup>17</sup><br>(deCODE sex-averaged recombination rate map) | --                                             | 10kb window                            |
| Lamin B1 domains                                               | Guelen et al., 2008 <sup>18</sup>                                               | Tig3ET normal human embryonic lung fibroblasts | 1bp (inside vs. outside of LAD)        |
| DNase hypersensitivity sites                                   | ENCODE                                                                          | multiple                                       | 1bp (inside vs. outside of DHS region) |
| Exonic site                                                    | RefSeq gene database                                                            | --                                             | 1bp (inside vs. outside of exon)       |
| CpG island                                                     | Wu et al., 2010 <sup>19</sup>                                                   | --                                             | 1bp (inside vs. outside of CpG island) |
| % GC content                                                   | Calculated from reference genome                                                | --                                             | 10kb                                   |

436 A script to download the exact external data files used in this paper is available at  
 437 <https://github.com/carjed/smaug-genetics>

438  
439

**Supplementary Table 6a Univariate tests for enrichment or depletion of *de novo* mutations occurring in feature-associated subtypes identified by logistic regression models.**

| Feature                  | Expected direction of effect | # mutations in feature-associated subtypes <sup>a</sup> | # mutations in feature |                       | p-value                                 | Consistent direction? |
|--------------------------|------------------------------|---------------------------------------------------------|------------------------|-----------------------|-----------------------------------------|-----------------------|
|                          |                              |                                                         | expected <sup>b</sup>  | observed <sup>c</sup> |                                         |                       |
| CpG Islands              | Increased                    | 648                                                     | 17                     | 14                    | 0.65                                    | No                    |
|                          | Decreased                    | 7072                                                    | 331                    | 84                    | <b><math>7.5 \times 10^{-35}</math></b> | <b>Yes</b>            |
| GC content               | Increased                    | 256                                                     | 22                     | 8                     | 0.99                                    | No                    |
|                          | Decreased                    | 2350                                                    | 56                     | 23                    | <b><math>1.1 \times 10^{-4}</math></b>  | <b>Yes</b>            |
| H3K36me3                 | Increased                    | 3731                                                    | 589                    | 682                   | <b><math>2.4 \times 10^{-3}</math></b>  | <b>Yes</b>            |
|                          | Decreased                    | 898                                                     | 162                    | 98                    | <b><math>1.3 \times 10^{-5}</math></b>  | <b>Yes</b>            |
| H3K9me3                  | Increased                    | 7361                                                    | 1165                   | 1905                  | <b><math>3.8 \times 10^{-51}</math></b> | <b>Yes</b>            |
| H3K27me3                 | Increased                    | 896                                                     | 274                    | 252                   | 0.86                                    | No                    |
| H3K4me1                  | Decreased                    | 2839                                                    | 557                    | 463                   | <b><math>1.2 \times 10^{-3}</math></b>  | <b>Yes</b>            |
| H3K4me3                  | Decreased                    | 3406                                                    | 566                    | 487                   | <b><math>8.1 \times 10^{-3}</math></b>  | <b>Yes</b>            |
| DHS                      | Increased                    | 1091                                                    | 177                    | 184                   | 0.38                                    | Yes                   |
|                          | Decreased                    | 2898                                                    | 701                    | 645                   | <b>0.04</b>                             | <b>Yes</b>            |
| Lamin-associated domains | Increased                    | 485                                                     | 187                    | 171                   | 0.85                                    | No                    |
| Recombination rate       | Increased                    | 2190                                                    | 306                    | 377                   | <b><math>1.9 \times 10^{-3}</math></b>  | <b>Yes</b>            |
| Replication timing       | Increased                    | 2359                                                    | 278                    | 321                   | <b>0.03</b>                             | <b>Yes</b>            |

440 For each feature for a given effect direction, we included all 7-mer subtypes with significant association  
 441 of the feature with relative mutation rate (**Fig. 5**). We counted: <sup>a</sup>the total number of *de novo* mutations  
 442 of those subtypes, <sup>b</sup>the number of these mutations expected to occur in the feature under the null  
 443 expectation that the feature has no impact on mutability (i.e., assuming only an effect of sequence  
 444 context), and <sup>c</sup>the number of these mutations that were observed to occur in the feature. Significant  
 445 associations are indicated by a one-sided p-value (observed numbers are consistent with model  
 446 predictions) in bold.



447  
448  
449

**Supplementary Table 6b Univariate tests for enrichment or depletion of *de novo* mutations occurring in feature-associated subtypes (excluding CpG subtypes) identified by logistic regression models.**

| Feature  | Expected direction of effect | # mutations in feature-associated subtypes <sup>a</sup> | # mutations in feature |                       | p-value                     | Consistent direction? |
|----------|------------------------------|---------------------------------------------------------|------------------------|-----------------------|-----------------------------|-----------------------|
|          |                              |                                                         | expected <sup>b</sup>  | observed <sup>c</sup> |                             |                       |
| H3K36me3 | Increased                    | 2844                                                    | 356                    | 474                   | <b>1.1×10<sup>-5</sup></b>  | <b>Yes</b>            |
|          | Decreased                    | 887                                                     | 160                    | 96                    | <b>1.8×10<sup>-5</sup></b>  | <b>Yes</b>            |
| H3K9me3  | Increased                    | 4050                                                    | 728                    | 1101                  | <b>4.9×10<sup>-23</sup></b> | <b>Yes</b>            |
| H3K27me3 | Increased                    | 238                                                     | 72                     | 60                    | 0.25                        | No                    |
| CpGI     | Increased                    | 610                                                     | 12                     | 9                     | 0.64                        | No                    |
| DHS      | Increased                    | 1061                                                    | 167                    | 173                   | 0.78                        | Yes                   |
|          | Decreased                    | 378                                                     | 101                    | 56                    | <b>8.4×10<sup>-5</sup></b>  | <b>Yes</b>            |

450  
451  
452  
453  
454  
455  
456  
457  
458  
459

For each feature, we identified all 7-mer subtypes where our model estimated a significant association (Fig. 3), separated into either an increased or decreased direction of effect, and counted: <sup>a</sup>the total number of non-CpG *de novo* mutations of those subtypes, <sup>b</sup>the number of these mutations that would occur in regions of the genome where that feature was present, under the null expectation that the feature has no impact on mutability (i.e., assuming only an effect of sequence context), and <sup>c</sup>the number of these mutations that were observed in the presence of that feature. Significant associations are indicated by a one-sided p-value in bold. Note that only 5 of the 15 groups described in **Supplementary Table 6a** contained sufficient numbers of non-CpG *de novo* mutations to perform these tests.

460 **Supplementary Table 7 Parameter estimates for genomic features model**

461 [see separate spreadsheet, table\_S7\_feature\_parameter\_estimates.xlsx]

462 This table contains effect size estimates and standard errors of 16 parameters (14 features, plus  
463 intercept and read depth) for each of the 24,489 7-mer subtypes with at least 10 singletons in the  
464 BRIDGES data.
